# Supplementary material for: SU-75: a disordered Ge10 germanate with pcu topology
Source: Royal Society of Chemistry journal article supplement (doi:10.1039/c2dt30767g), 2012-01-01
Supplement: c2dt30767g.pdf [file c2dt30767g.pdf]

## Supporting Information

### SU-75: A Disordered Ge<sub>10</sub> Germanate with the pcu Topology

Shiliang Huang,<sup>a,#</sup> A. Ken Inge,<sup>a,#</sup> Sihai Yang,<sup>b</sup> Kirsten E. Christensen,<sup>c</sup> Xiaodong Zou,<sup>a\*</sup> and Junliang Sun<sup>a\*</sup>

<sup>a</sup> *Department of Materials and Environmental Chemistry and Berzelii Center EXSELENT on Porous Materials, Stockholm University, SE-10691 Stockholm, Sweden*

<sup>b</sup> *School of Chemistry, The University of Nottingham, Nottingham NG7 2RD, United Kingdom*

<sup>c</sup> *Diamond Light Source Ltd, Diamond House, Harwell Science and Innovation Campus, Didcot, Oxfordshire, OX11 0DE, United Kingdom*

#### Contents

- Figure S1 SEM images of SU-75.
- Figure S2 Experimental powder X-ray diffraction (XRD) pattern of SU-75(dab).
- Figure S3 Thermogravimetric analysis of SU-75(dien).
- Figure S4 Powder XRD patterns of SU-75(dien) before and after ion-exchanging.
- Figure S5 Different choices of SBU in Ge<sub>10</sub> germanate.
- Figure S6 *In-situ* powder XRD patterns of SU-75(dien).
- Figure S7 *In-situ* powder XRD patterns of LNM-1 (Ge-pharmacosiderite).

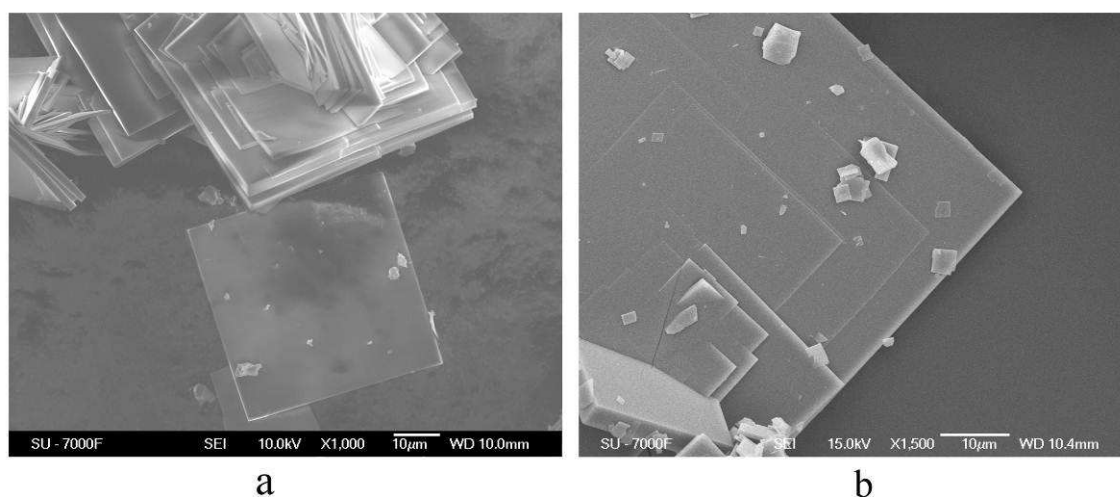

**Figure S1** SEM images of SU-75. (a) The crystals synthesized with diethylenetriamine (dien) as the structure directing agent; (b) The crystals synthesized with diaminebutane (dab) as the structure directing agent.

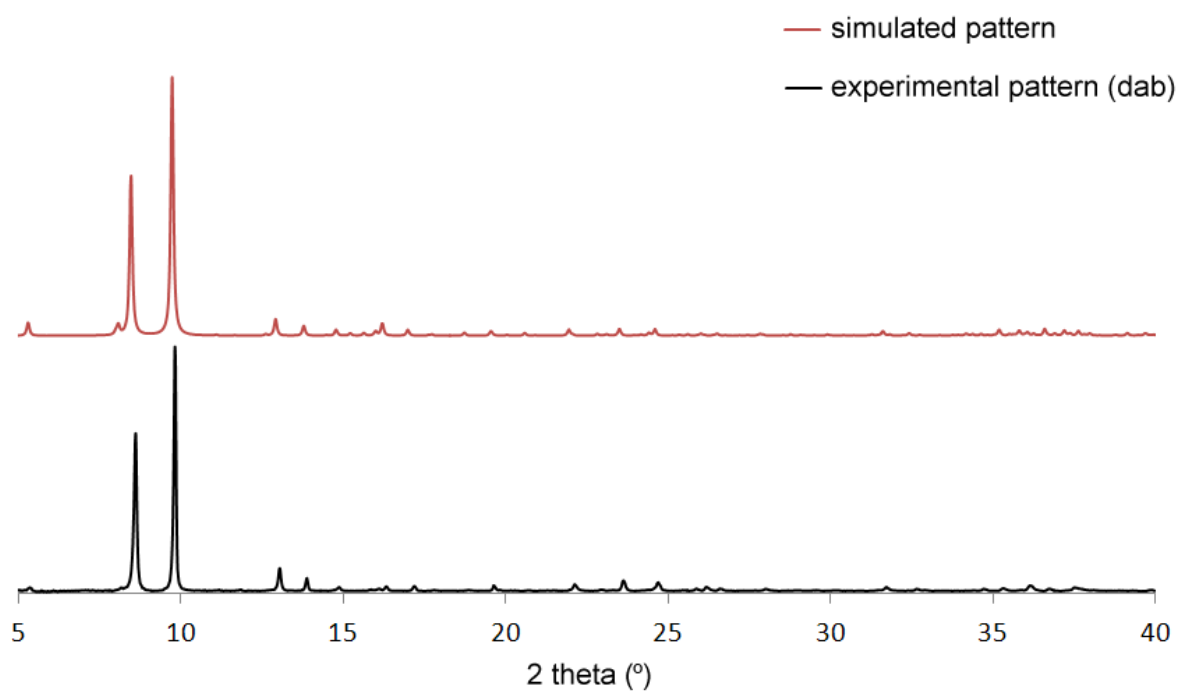

**Figure S2** The experimental powder XRD pattern of SU-75(dab) compared to the simulated powder XRD pattern.

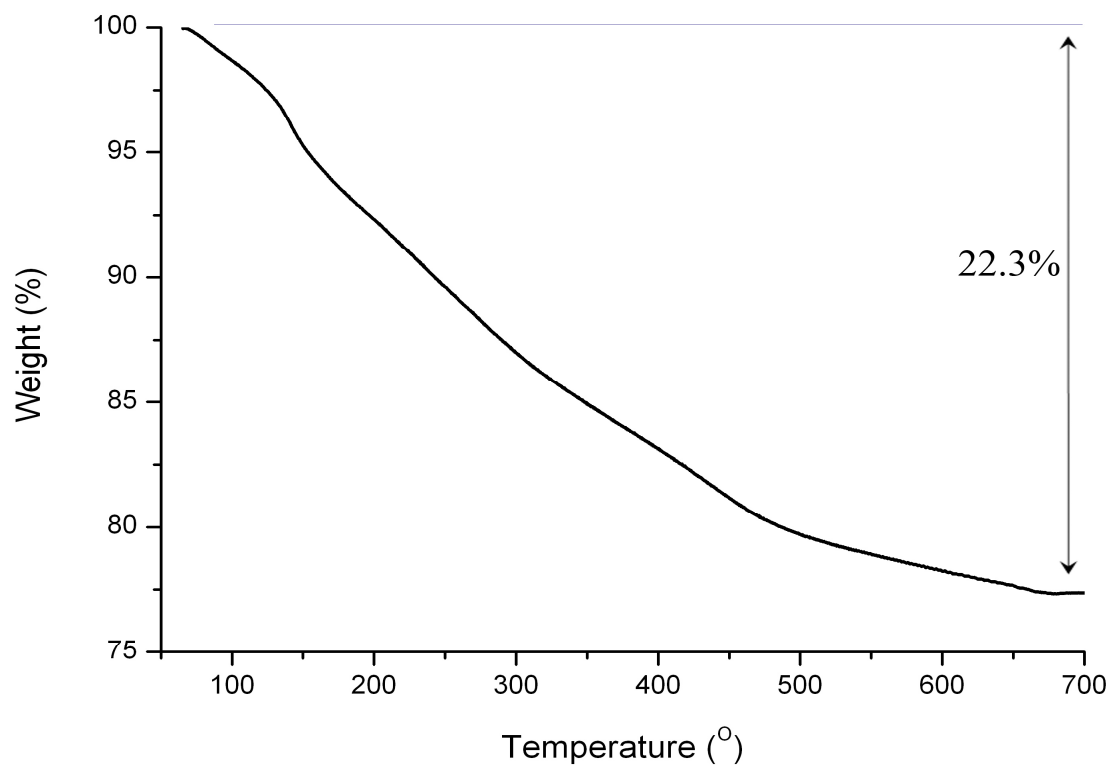

**Figure S3** Thermogravimetric curve of SU-75(dien) performed in N<sub>2</sub> flow from 50 to 700 °C at a heating rate of 5 °C/min. The total weight loss of 22.3% between 50°C and 700°C was attributed to the loss of water and the dien molecules. The content of water and dien molecules calculated from the chemical formula 21.6 w.t% ( $n=5$ ) or 22.8 w.t% ( $n=6$ ), which is consistent with the TGA result.

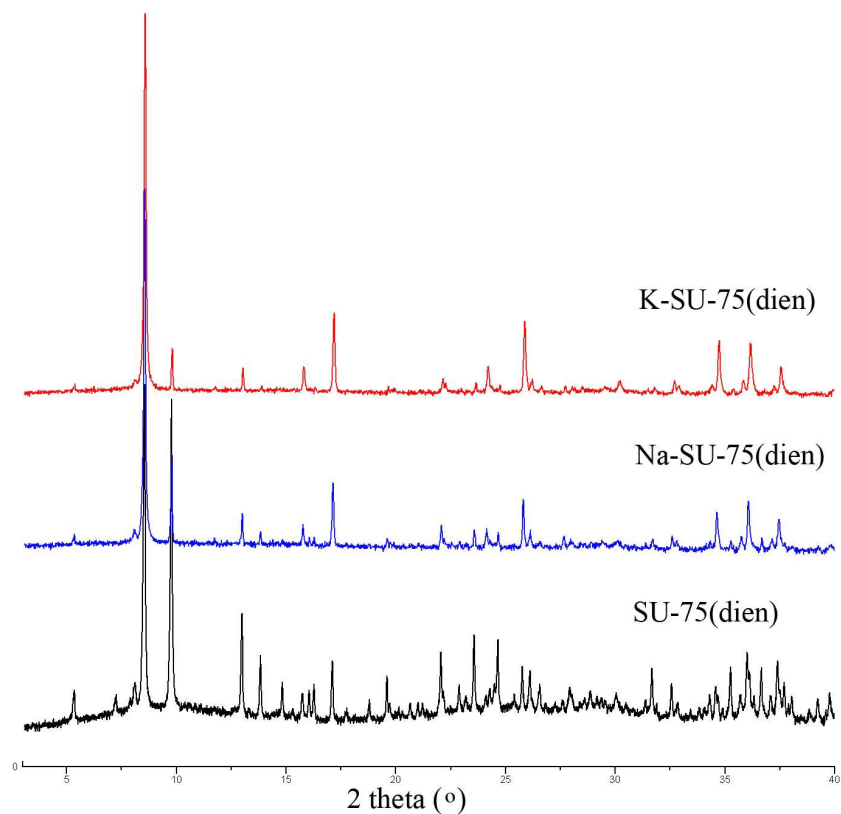

**Figure S4** Powder XRD patterns of SU-75(dien) before and after ion-exchanging. The framework was kept after 50% of SDAs were exchanged by Na<sup>+</sup> or K<sup>+</sup>.

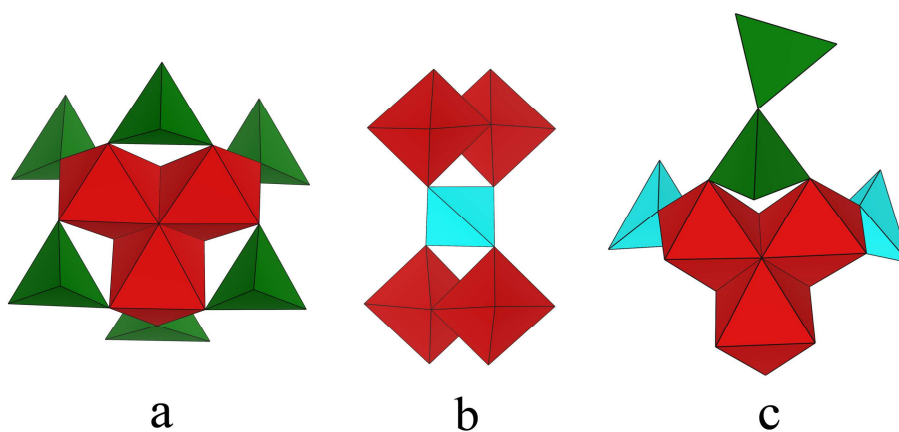

**Figure S5** Different secondary building units (SBUs) used for describing the Ge<sub>10</sub> germanates. (a) The Ge<sub>10</sub> cluster in SU-75, (b) a Ge<sub>5</sub> building unit in LNM-1 and (c) a Ge<sub>8</sub> building unit in IM-14.

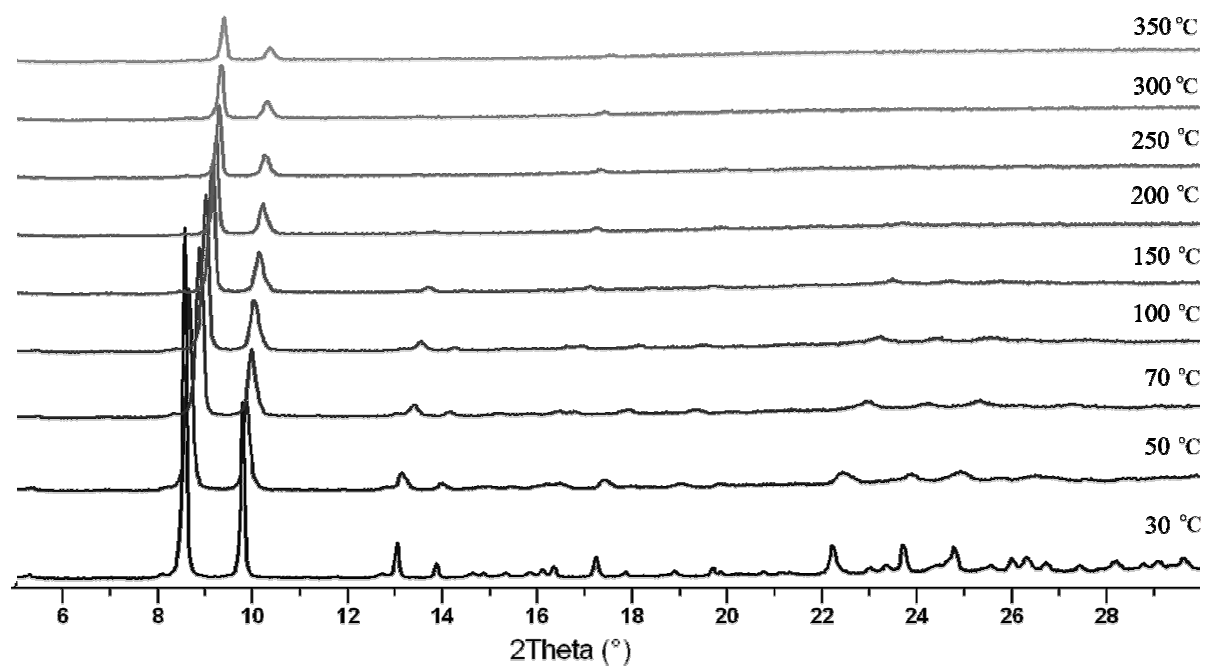

**Figure S6** *In-situ* powder XRD patterns for SU-75. SU-75 was stable up to 50 °C before the crystallinity started to degrade.

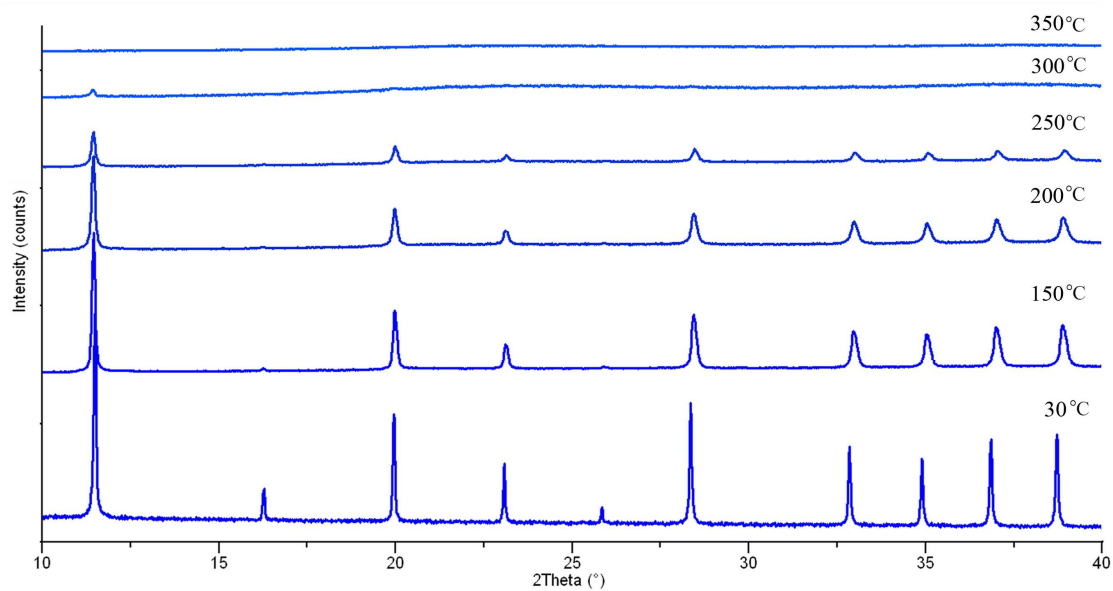

**Figure S7** *In-situ* powder XRD patterns for LNM-1 (Ge-pharmacosiderite). LNM-1 was stable up to 250 °C.
